# Supplementary material for: Synthesis and Antimicrobial Activity of Short Analogues of the Marine Antimicrobial Peptide Turgencin A: Effects of SAR Optimizations, Cys-Cys Cyclization and Lipopeptide Modifications
Source: MDPI journal article supplement (doi:10.3390/ijms232213844), 2022-11-10
Supplement: s1 [file s1]

## Supporting information

# Synthesis and Antimicrobial Activity of Short Analogues of the Marine Antimicrobial Peptide Turgencin A: Effects of SAR Optimizations, Cys-Cys Cyclization And lipopeptide Modifications

Hymonti Dey <sup>1,†</sup>, Danijela Simonovic <sup>2,†</sup>, Ingrid Norberg-Schulz Hagen <sup>2</sup>, Terje Vasskog <sup>2</sup>, Elizabeth G. Aarag Fredheim <sup>2</sup>, Hans-Matti Blencke <sup>1</sup>, Trude Anderssen <sup>2</sup>, Morten B. Strøm <sup>2,\*</sup> and Tor Haug <sup>1,\*</sup>

<sup>1</sup> The Norwegian College of Fishery Science, Faculty of Biosciences, Fisheries and Economics, UiT The Arctic University of Norway, NO-9037 Tromsø, Norway

<sup>2</sup> Department of Pharmacy, Faculty of Health Sciences, UiT The Arctic University of Norway, NO-9037 Tromsø, Norway

\* Correspondence: morten.strom@uit.no (M.B.S.); tor.haug@uit.no (T.H.)

† These authors contributed equally to this work.

### Contents:

**Figure S1.** UPLC chromatogram of purified cyclic peptide **cTurg-1**.

**Figure S2.** UPLC chromatogram of purified cyclic peptide **cTurg-2**.

**Figure S3.** UPLC chromatogram of purified cyclic peptide **cTurg-3**.

**Figure S4.** UPLC chromatogram of purified cyclic peptide **cTurg-4**.

**Figure S5.** UPLC chromatogram of purified cyclic peptide **cTurg-5**.

**Figure S6.** UPLC chromatogram of purified cyclic peptide **cTurg-6**.

**Figure S7.** UPLC chromatogram of purified cyclic peptide **cTurg-7**.

**Figure S8.** UPLC chromatogram of purified linear lipopeptide **C<sub>8</sub>-Turg-1**.

**Figure S9.** UPLC chromatogram of purified linear lipopeptide **C<sub>10</sub>-Turg-1**.

**Figure S10.** UPLC chromatogram of purified linear lipopeptide **C<sub>12</sub>-Turg-1**.

**Figure S11.** UPLC chromatogram of purified linear lipopeptide **C<sub>8</sub>-Turg-2**.

**Figure S12.** UPLC chromatogram of purified linear lipopeptide **C<sub>10</sub>-Turg-2**.

**Figure S13.** UPLC chromatogram of purified linear lipopeptide **C<sub>12</sub>-Turg-2**.

**Figure S14.** UPLC chromatogram of purified linear lipopeptide **C<sub>8</sub>-Turg-6**.

**Figure S15.** UPLC chromatogram of purified linear lipopeptide **C<sub>10</sub>-Turg-6**.

**Figure S16.** UPLC chromatogram of purified linear lipopeptide **C<sub>12</sub>-Turg-6**.

**Figure S17.** UPLC chromatogram of purified cyclic lipopeptide **C<sub>8</sub>-cTurg-1**.

**Figure S18.** UPLC chromatogram of purified cyclic lipopeptide **C<sub>10</sub>-cTurg-1**.

**Figure S19.** UPLC chromatogram of purified cyclic lipopeptide **C<sub>12</sub>-cTurg-1**.

**Figure S20.** UPLC chromatogram of purified cyclic lipopeptide **C<sub>8</sub>-cTurg-2**.

**Figure S21.** UPLC chromatogram of purified cyclic lipopeptide **C<sub>10</sub>-cTurg-2**.

**Figure S22.** UPLC chromatogram of purified cyclic lipopeptide **C<sub>12</sub>-cTurg-2**.

**Figure S23.** UPLC chromatogram of purified cyclic lipopeptide **C<sub>8</sub>-cTurg-6**.

**Figure S24.** UPLC chromatogram of purified cyclic lipopeptide **C<sub>10</sub>-cTurg-6**.

**Figure S25.** UPLC chromatogram of purified cyclic lipopeptide **C<sub>12</sub>-cTurg-6**.

**Figure S26.** Kinetic of the effect on viability as measured by relative luminescence in *B. subtilis* (pCGLS11) treated with different concentrations of **cTurg-2**, **cTurg-3**, **cTurg-4**, **cTurg-5**, **cTurg-6** and **cTurg-7**.

**Figure S27.** Kinetic of the effect on viability as measured by relative luminescence in *B. subtilis* (pCGLS11) treated with different concentrations of **C<sub>8</sub>-cTurg-1**, **C<sub>10</sub>-cTurg-1**, **C<sub>10</sub>-cTurg-2**, **C<sub>12</sub>-cTurg-2**, **C<sub>8</sub>-cTurg-6**, **C<sub>10</sub>-cTurg-6**, and **C<sub>12</sub>-cTurg-6**.

**Figure S28.** Kinetic of the effect on membrane integrity as measured by relative luminescence in *B. subtilis* (pCSS962) treated with different concentrations of **cTurg-1**, **cTurg-2**, **cTurg-3**, **cTurg-4**, **cTurg-5**, **cTurg-6** and **cTurg-7**.

**Figure S29.** Kinetic of the effect on membrane integrity as measured by relative luminescence in *B. subtilis* (pCSS962) treated with different concentrations of **C<sub>8</sub>-cTurg-1**, **C<sub>10</sub>-cTurg-1**, **C<sub>10</sub>-cTurg-2**, **C<sub>12</sub>-cTurg-2**, **C<sub>8</sub>-cTurg-6**, **C<sub>10</sub>-cTurg-6**, and **C<sub>12</sub>-cTurg-6**.

**Figure S30.** Kinetic of the effect on viability as measured by relative luminescence in *E. coli* (pCGLS-11) treated with 50 µg/mL of **cTurg-1-7** and 25 µg/mL of **chlorhexidine**.

**Figure S31.** Kinetic of the effect on viability as measured by relative luminescence in *E. coli* (pCGLS-11) treated with different concentrations of **C<sub>8</sub>-cTurg-1**, **C<sub>10</sub>-cTurg-1**, **C<sub>10</sub>-cTurg-2**, **C<sub>12</sub>-cTurg-2**, **C<sub>8</sub>-cTurg-6**, **C<sub>10</sub>-cTurg-6**, and **C<sub>12</sub>-cTurg-6**.

**Figure S32.** Kinetic of the effect on membrane integrity as measured by relative luminescence in *E. coli* (pCSS962) treated with different concentrations of cyclic peptides **cTurg-1**, **cTurg-2**, **cTurg-3**, **cTurg-4**, **cTurg-5**, **cTurg-6** and **cTurg-7**.

**Figure S33.** Kinetic of the effect on membrane integrity as measured by relative luminescence in *E. coli* (pCSS962) treated with different concentrations of **C<sub>8</sub>-cTurg-1**, **C<sub>10</sub>-cTurg-1**, **C<sub>10</sub>-cTurg-2**, **C<sub>12</sub>-cTurg-2**, **C<sub>8</sub>-cTurg-6**, **C<sub>10</sub>-cTurg-6**, and **C<sub>12</sub>-cTurg-6**.

**Table S1.** Theoretical and measured monoisotopic mass (Da), and theoretical and observed m/z ions during HRMS of the synthesised peptides.

**Table S2.** Purity of synthesized peptides (%) and retention time (min), determined by UPLC using a reversed phase column.

**Table S3.** Selectivity index (SI) calculated as the ration between haemolytic activity (EC<sub>50</sub>, in µg/mL) and the geometric mean (GM) of the MIC values (in µg/mL) against bacteria and fungi, i.e., SI = EC<sub>50</sub> / GM.

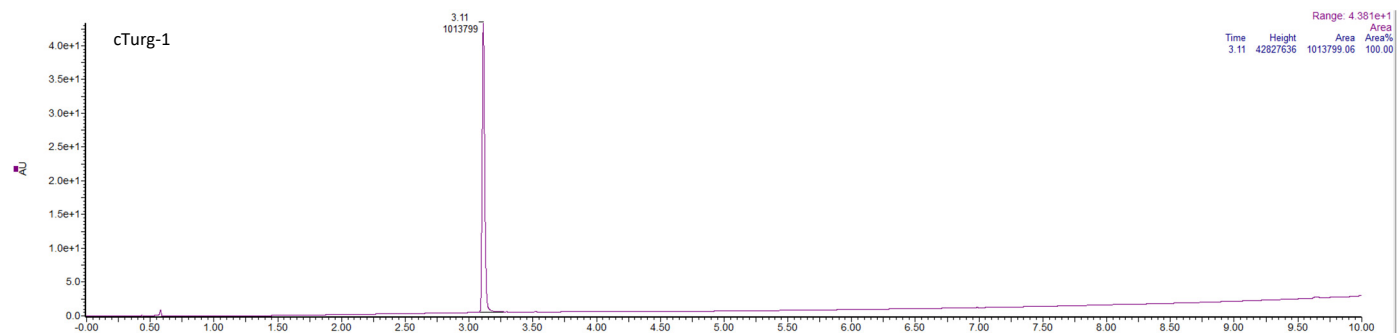

**Figure S1.** UPLC chromatogram of purified cyclic peptide **cTurg-1**. The peptide purity is 100 % based on the UPLC calculated area under the curves.

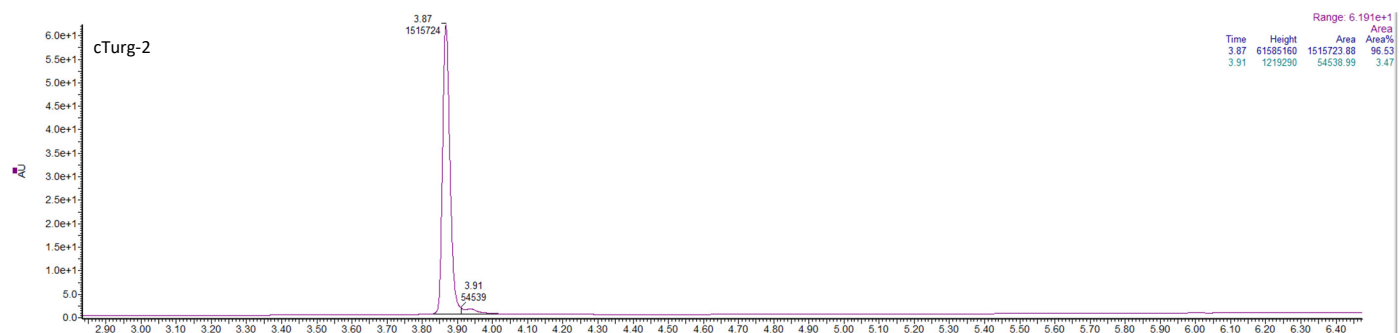

**Figure S2.** UPLC chromatogram of purified cyclic peptide **cTurg-2**. The peptide purity is 96.53 % based on the UPLC calculated area under the curves.

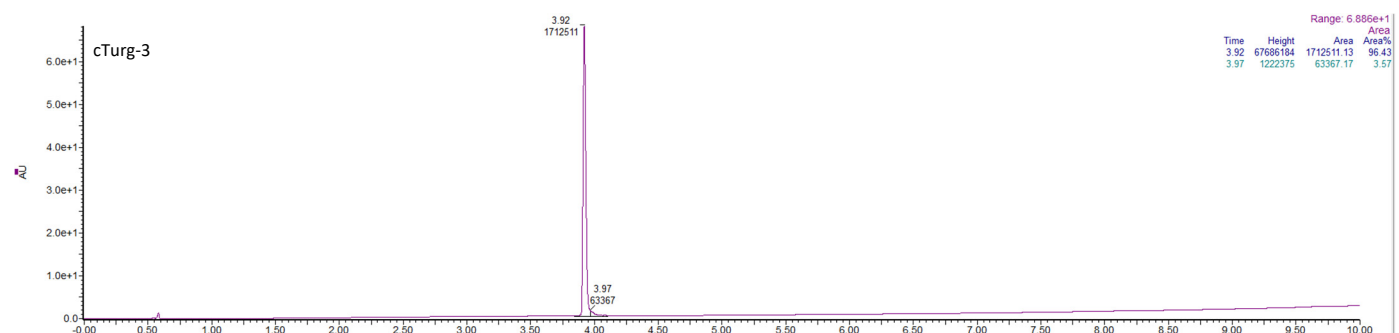

**Figure S3.** UPLC chromatogram of purified cyclic peptide **cTurg-3**. The peptide purity is 96.43 % based on the UPLC calculated area under the curves.

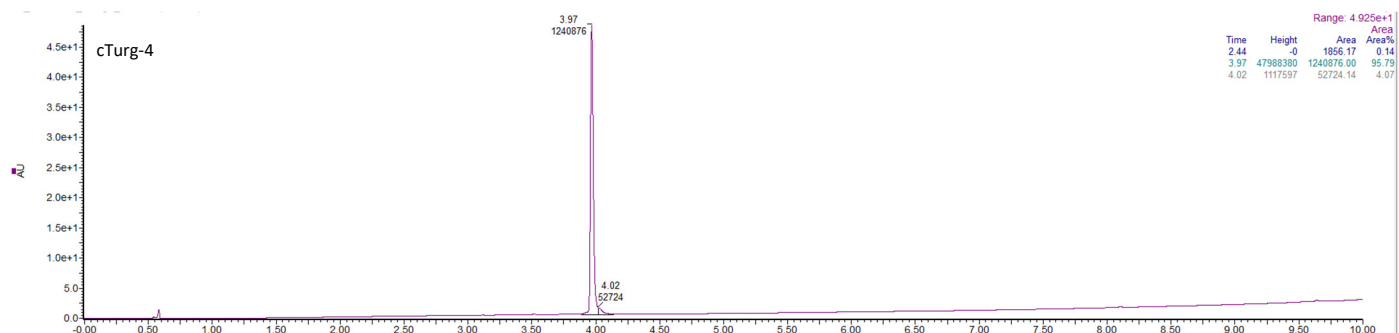

**Figure S4.** UPLC chromatogram of purified cyclic peptide **cTurg-4**. The peptide purity is 95.79 % based on the UPLC calculated area under the curves.

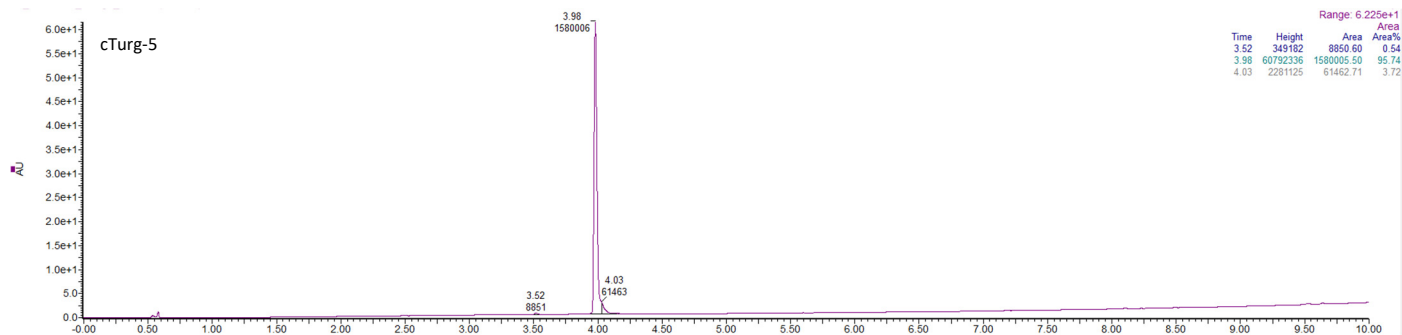

**Figure S5.** UPLC chromatogram of purified cyclic peptide **cTurg-5**. The peptide purity is 95.74 % based on the UPLC calculated area under the curves.

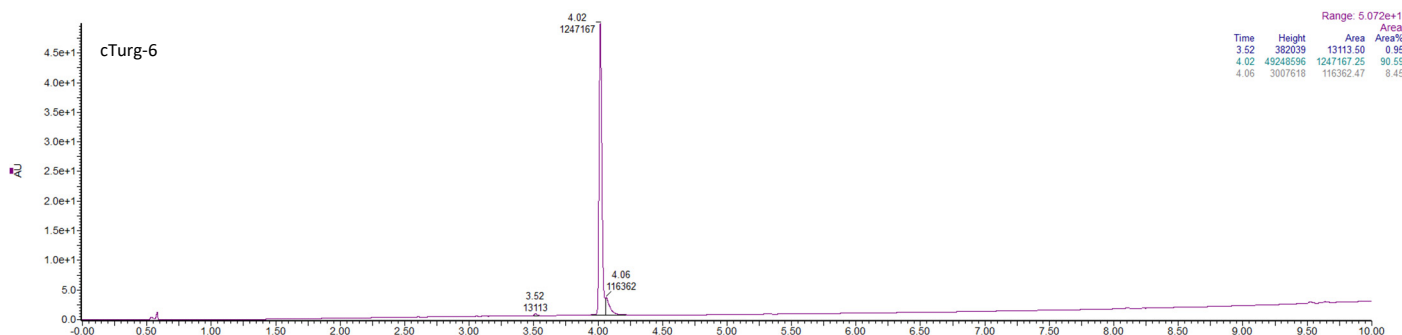

**Figure S6.** UPLC chromatogram of purified cyclic peptide **cTurg-6**. The peptide purity is 90.59 % based on the UPLC calculated area under the curves.

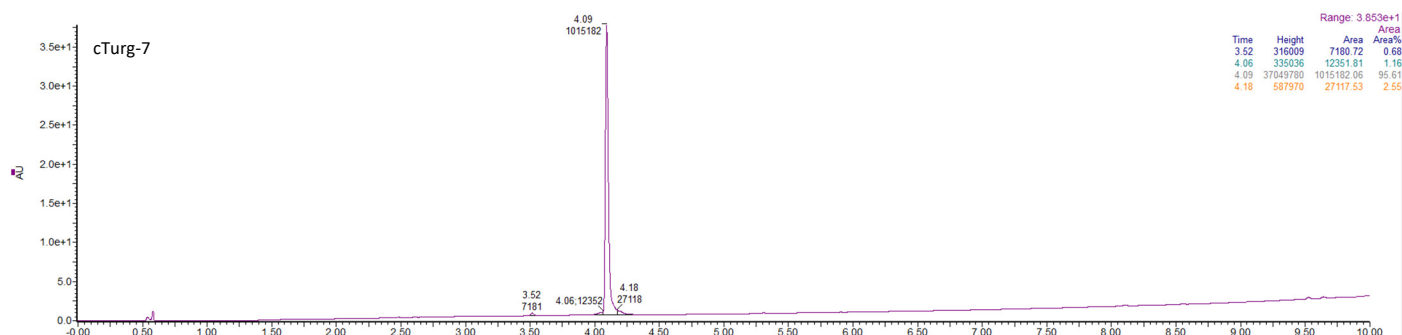

**Figure S7.** UPLC chromatogram of purified cyclic peptide **cTurg-7**. The peptide purity is 95.61 % based on the UPLC calculated area under the curves.

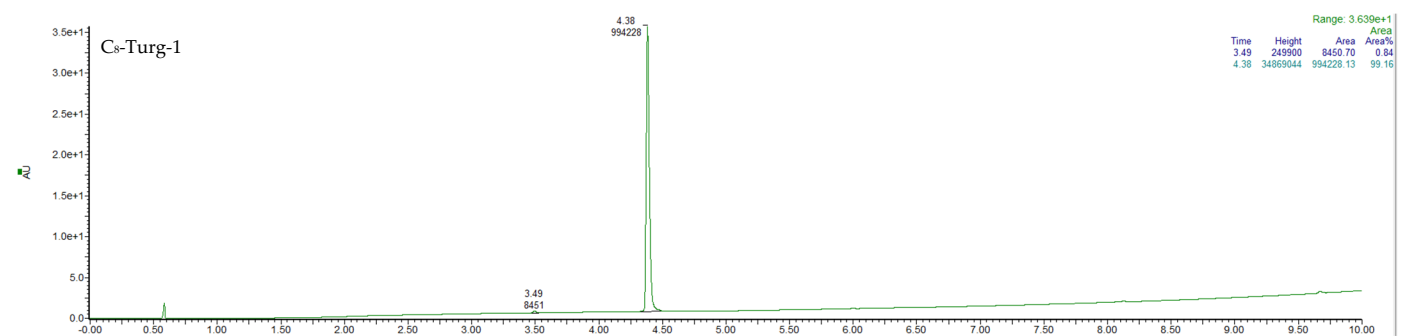

**Figure S8.** UPLC chromatogram of purified linear lipopeptide **C<sub>8</sub>-Turg-1**. The peptide purity is 99.16 % based on the UPLC calculated area under the curves.

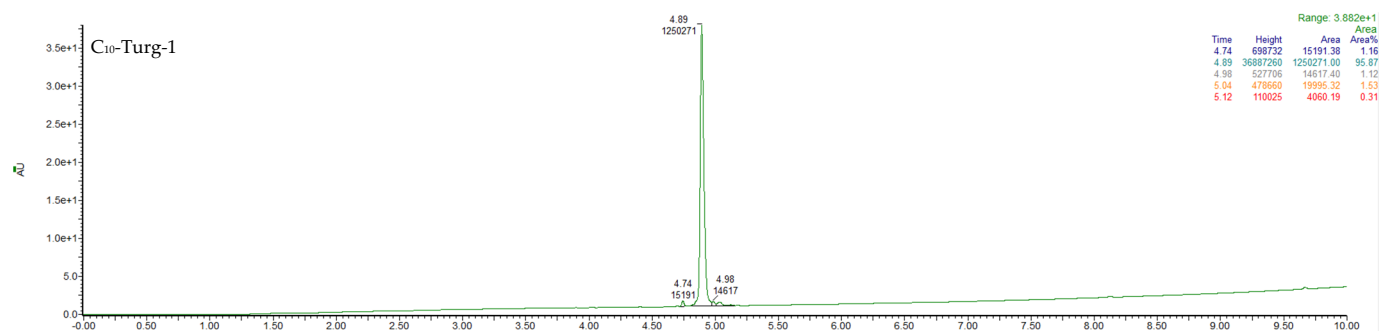

**Figure S9.** UPLC chromatogram of purified linear lipopeptide **C<sub>10</sub>-Turg-1**. The peptide purity is 95.87 % based on the UPLC calculated area under the curves.

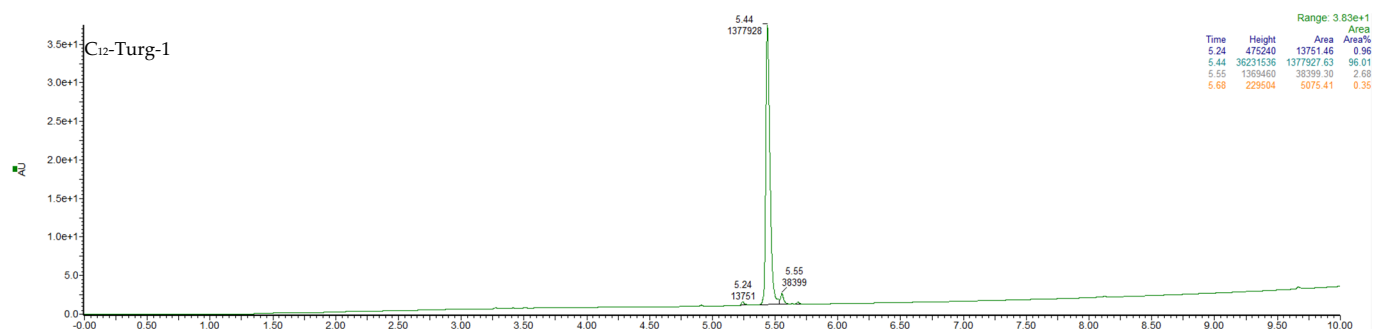

**Figure S10.** UPLC chromatogram of purified linear lipopeptide **C<sub>12</sub>-Turg-1**. The peptide purity is 96.01 % based on the UPLC calculated area under the curves.

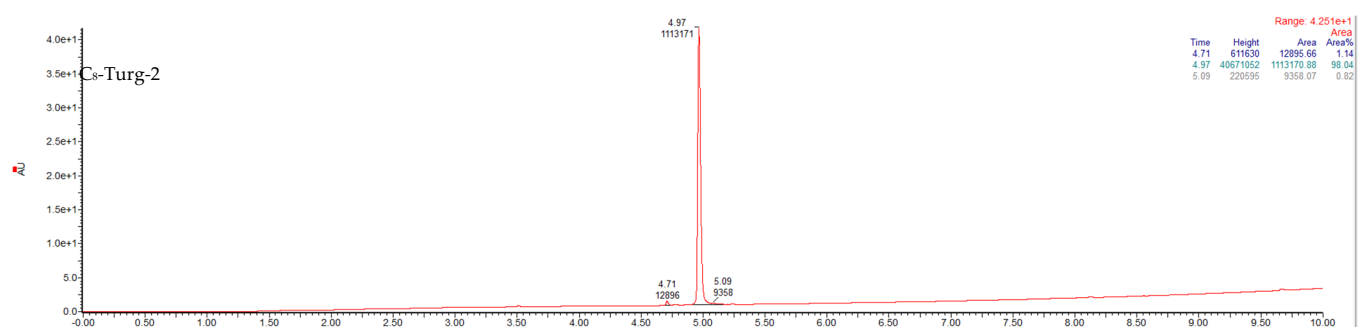

**Figure S11.** UPLC chromatogram of purified linear lipopeptide **C<sub>8</sub>-Turg-2**. The peptide purity is 98.04 % based on the UPLC calculated area under the curves.

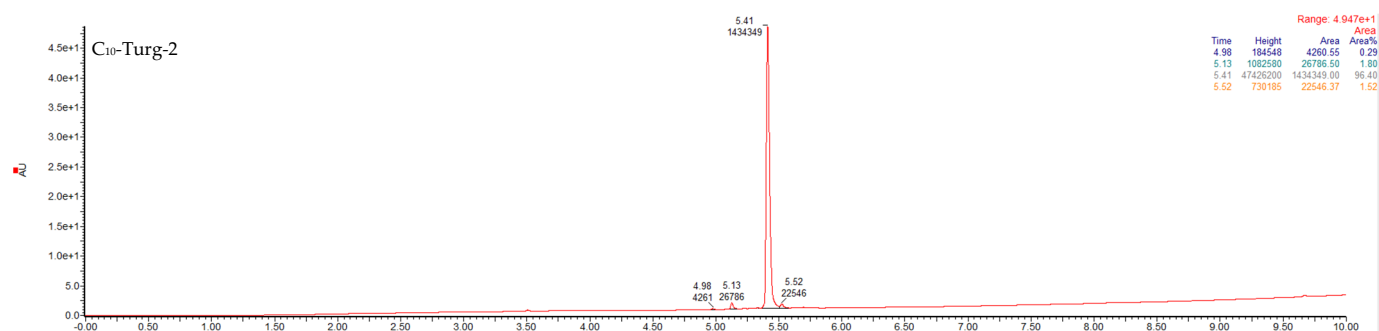

**Figure S12.** UPLC chromatogram of purified linear lipopeptide **C<sub>10</sub>-Turg-2**. The peptide purity is 96.40 % based on the UPLC calculated area under the curves.

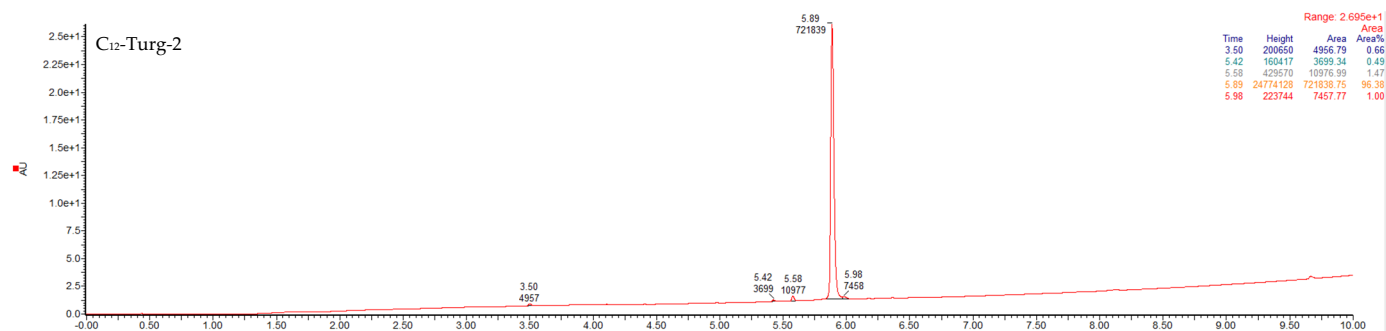

**Figure S13.** UPLC chromatogram of purified linear lipopeptide **C<sub>12</sub>-Turg-2**. The peptide purity is 96.38 % based on the UPLC calculated area under the curves.

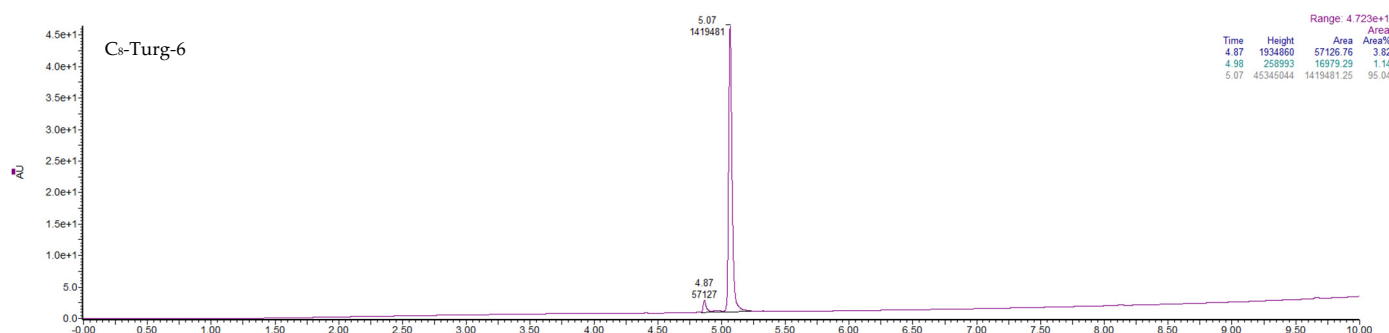

**Figure S14.** UPLC chromatogram of purified linear lipopeptide **C<sub>8</sub>-Turg-6**. The peptide purity is 95.04 % based on the UPLC calculated area under the curves.

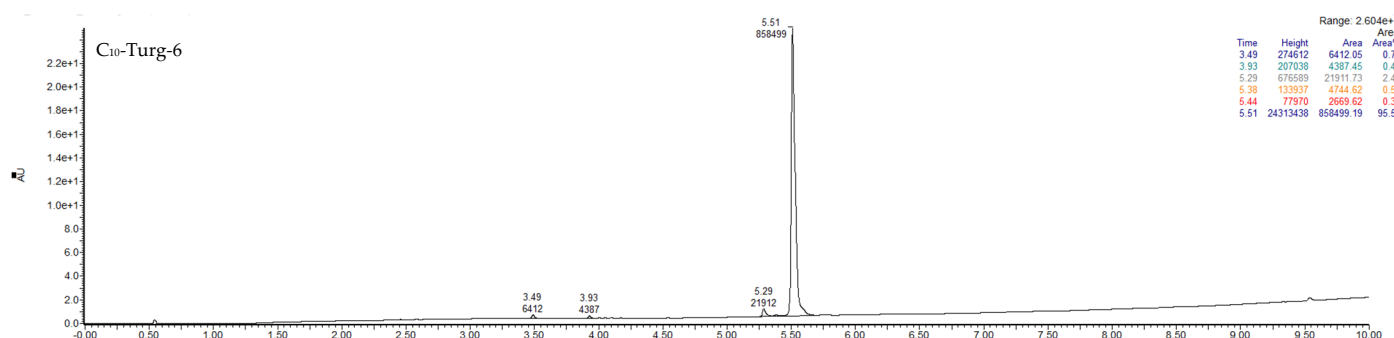

**Figure S15.** UPLC chromatogram of purified linear lipopeptide **C<sub>10</sub>-Turg-6**. The peptide purity is 95.53 % based on the UPLC calculated area under the curves.

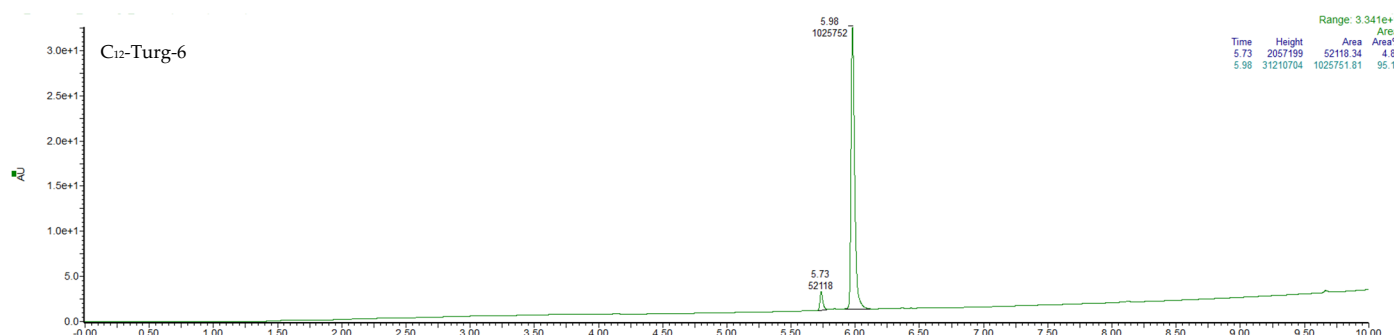

**Figure S16.** UPLC chromatogram of purified linear lipopeptide **C<sub>12</sub>-Turg-6**. The peptide purity is 95.16 % based on the UPLC calculated area under the curves.

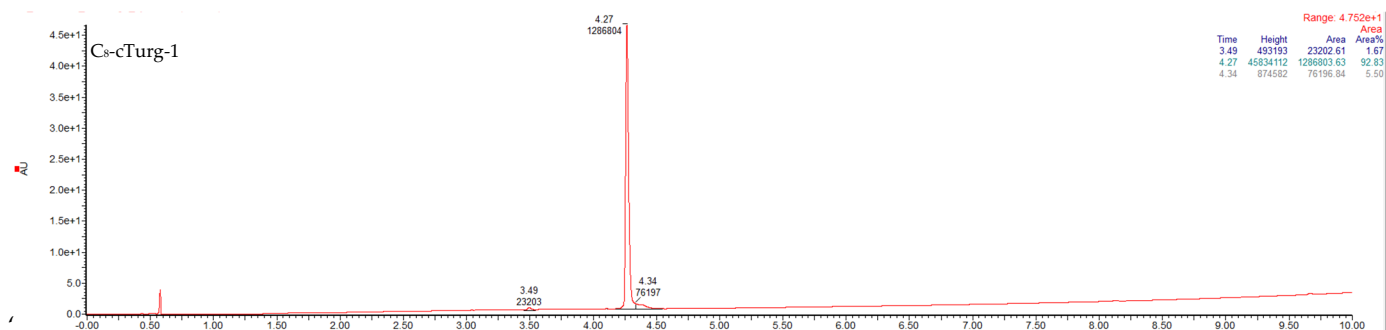

**Figure S17.** UPLC chromatogram of purified cyclic lipopeptide **C<sub>8</sub>-cTurg-1**. The peptide purity is 92.83 % based on the UPLC calculated area under the curves.

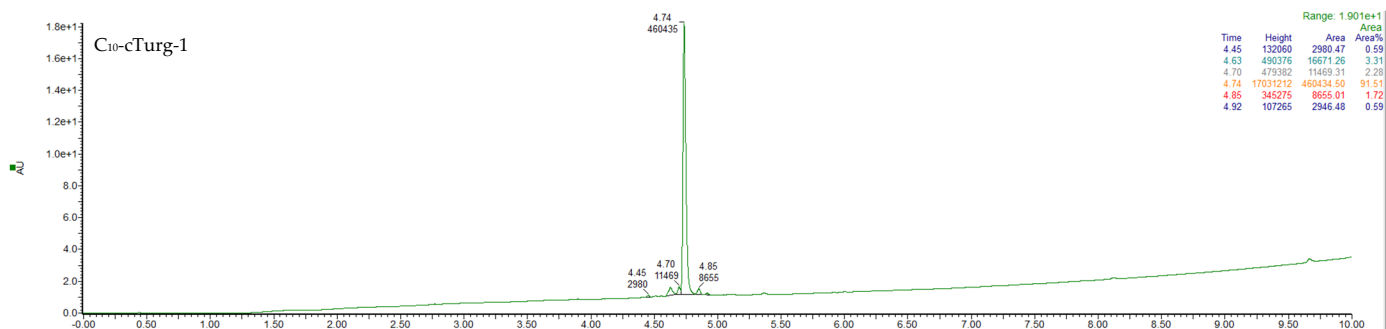

**Figure S18.** UPLC chromatogram of purified cyclic lipopeptide **C<sub>10</sub>-cTurg-1**. The peptide purity is 91.51 % based on the UPLC calculated area under the curves.

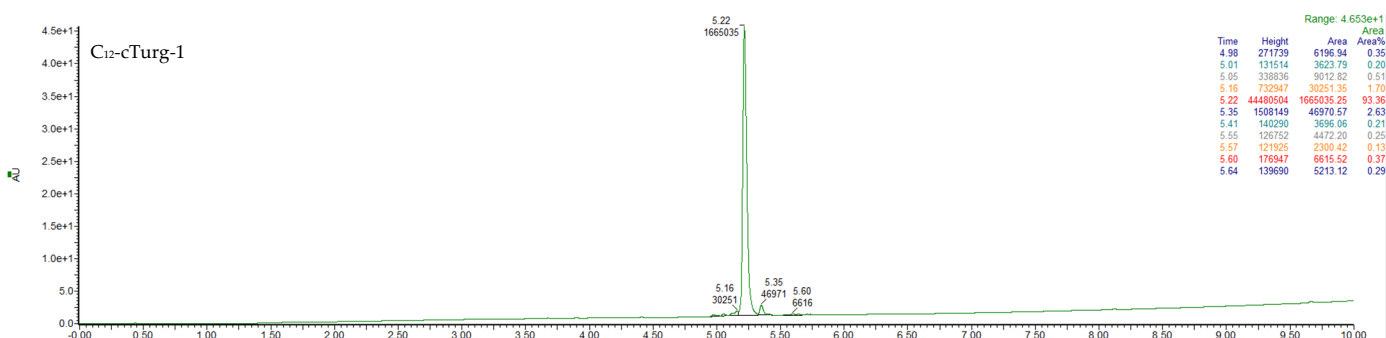

**Figure S19.** UPLC chromatogram of purified cyclic lipopeptide **C<sub>12</sub>-cTurg-1**. The peptide purity is 93.36 % based on the UPLC calculated area under the curves.

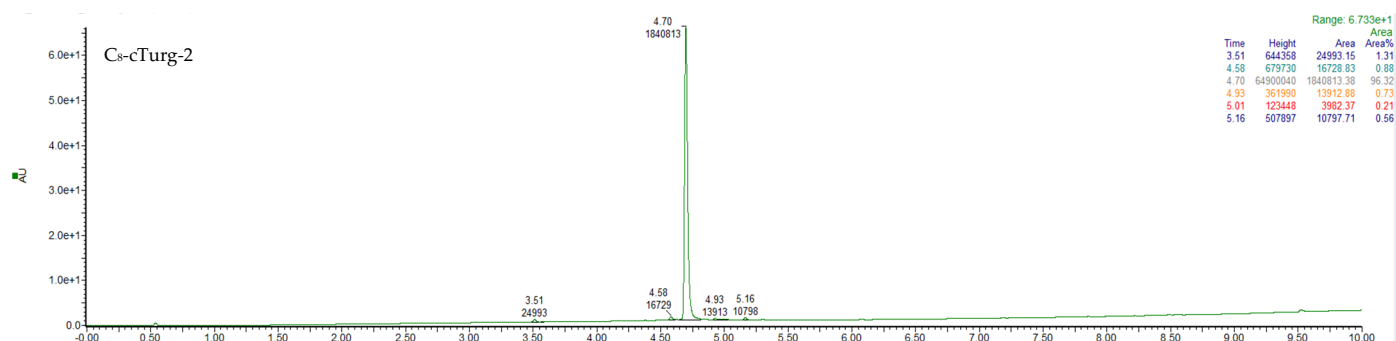

**Figure S20.** UPLC chromatogram of purified cyclic lipopeptide **C<sub>8</sub>-cTurg-2**. The peptide purity is 96.32 % based on the UPLC calculated area under the curves.

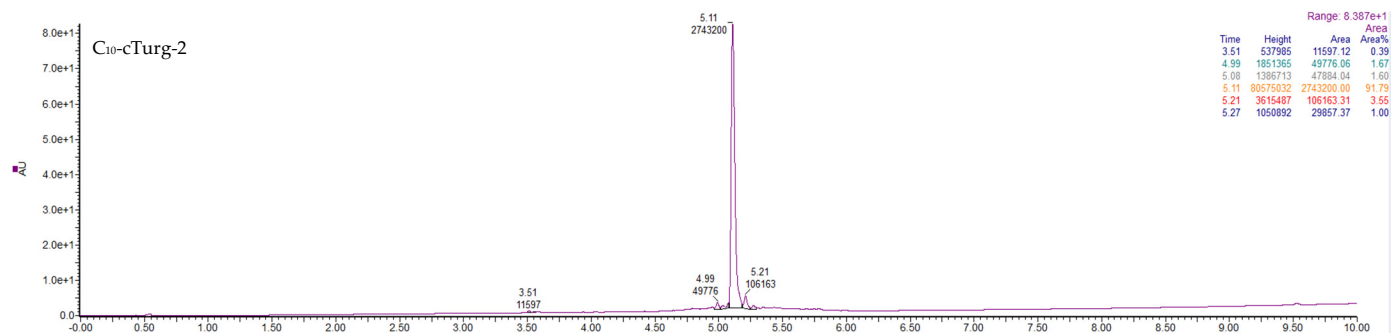

**Figure S21.** UPLC chromatogram of purified cyclic lipopeptide **C<sub>10</sub>-cTurg-2**. The peptide purity is 91.79 % based on the UPLC calculated area under the curves.

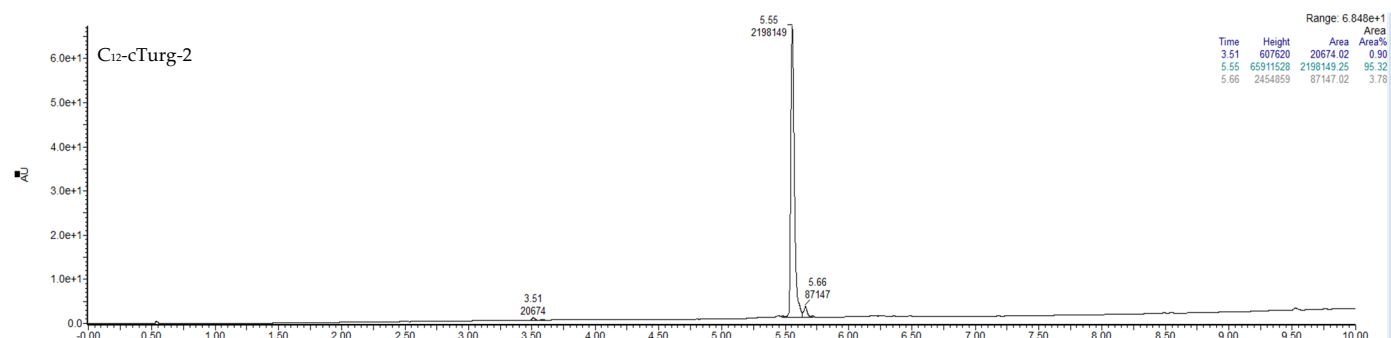

**Figure S22.** UPLC chromatogram of purified cyclic lipopeptide **C<sub>12</sub>-cTurg-2**. The peptide purity is 95.32 % based on the UPLC calculated area under the curves.

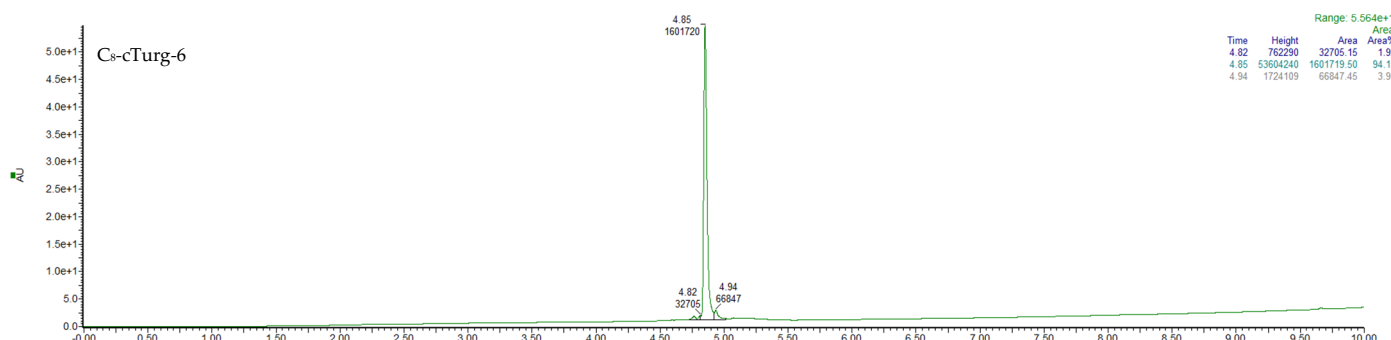

**Figure S23.** UPLC chromatogram of purified cyclic lipopeptide **C<sub>8</sub>-cTurg-6**. The peptide purity is 94.15 % based on the UPLC calculated area under the curves.

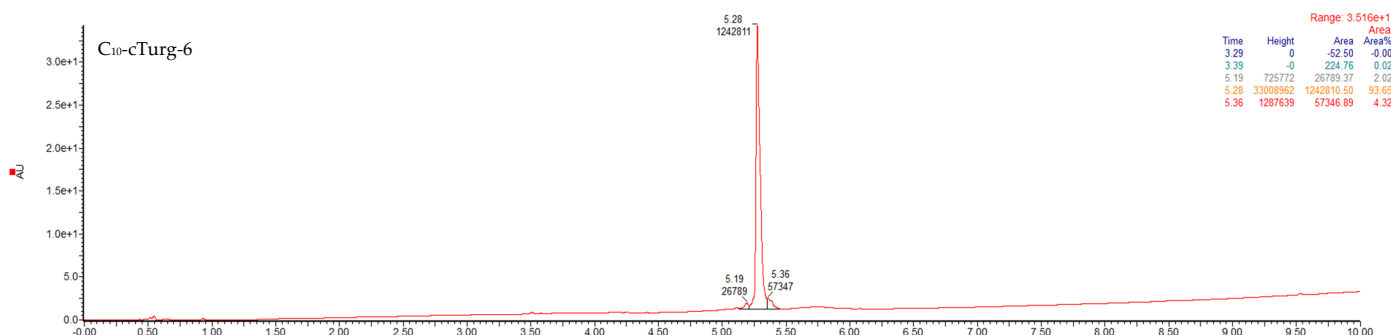

**Figure S24.** UPLC chromatogram of purified cyclic lipopeptide **C<sub>10</sub>-cTurg-6**. The peptide purity is 93.65 % based on the UPLC calculated area under the curves.



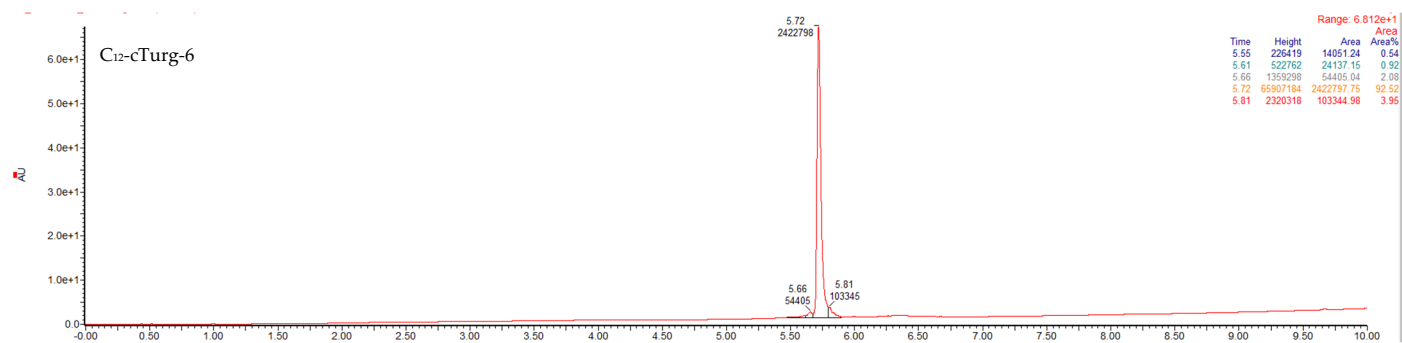

**Figure S25.** UPLC chromatogram of purified cyclic lipopeptide **C<sub>12</sub>-cTurg-6**. The peptide purity is 92.52 % based on the UPLC calculated area under the curves.

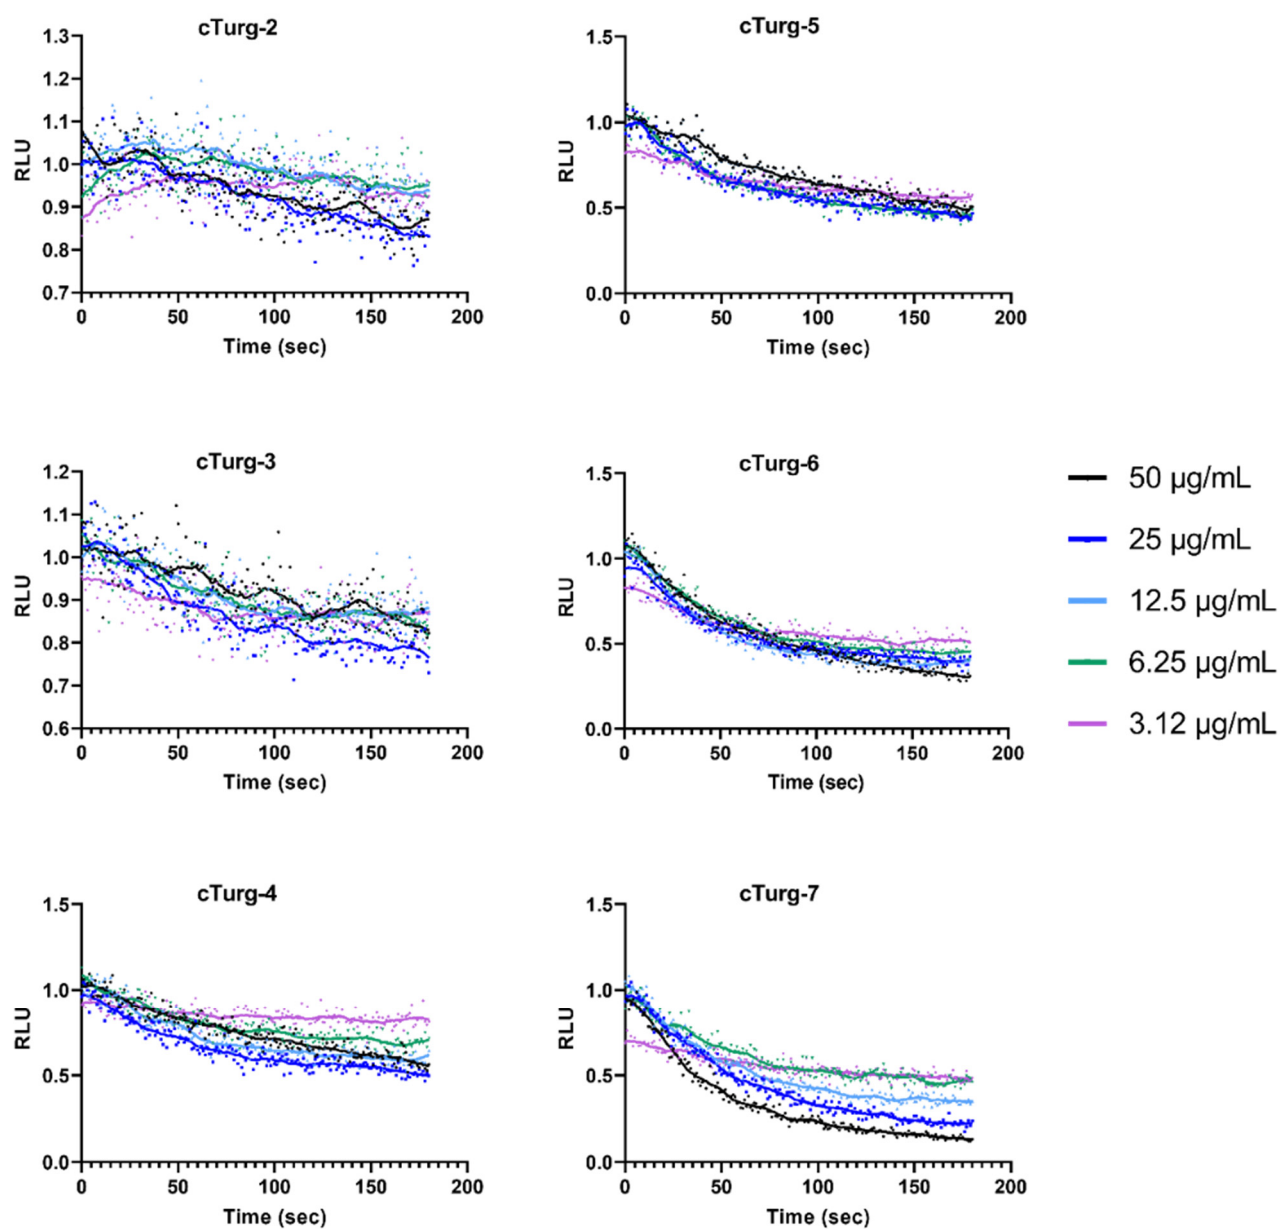

**Figure S26.** Kinetic of the effect on viability as measured by relative luminescence in *B. subtilis* (pCGLS11) treated with different concentrations of cTurg-2, cTurg-3, cTurg-4, cTurg-5, cTurg-6 and cTurg-7.

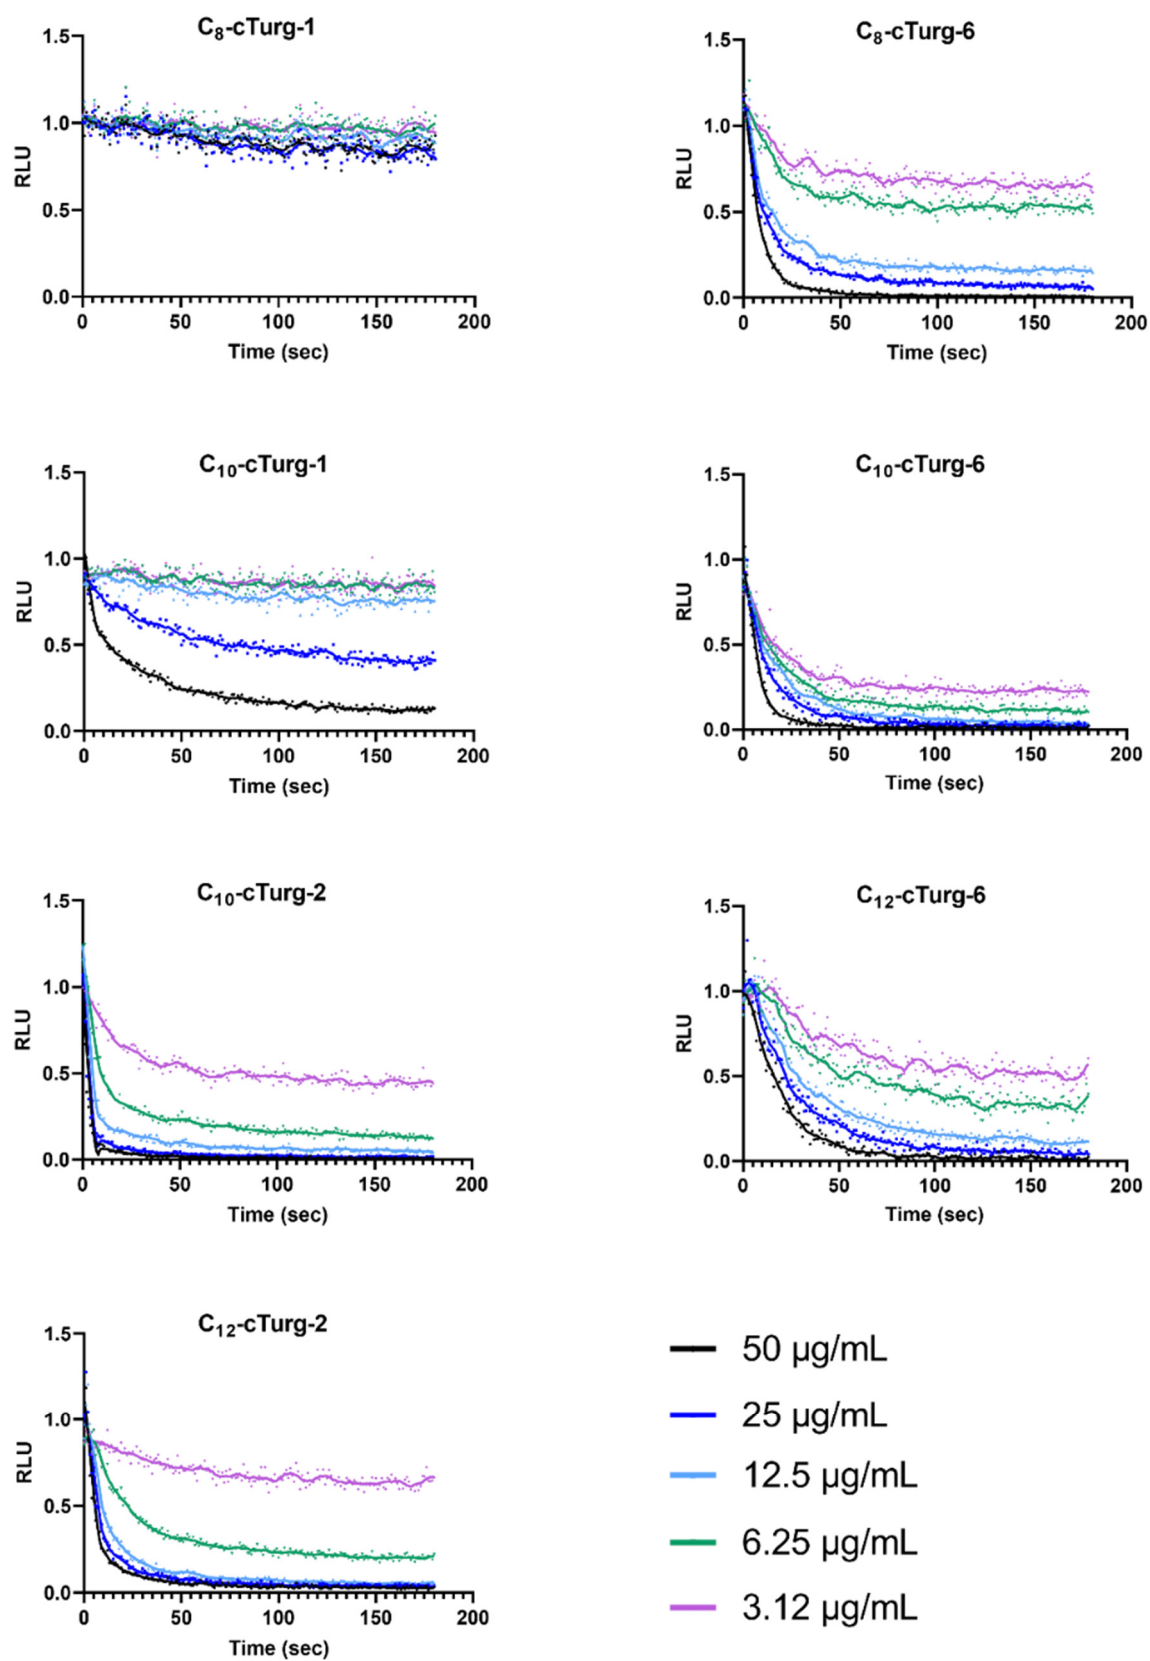

**Figure S27.** Kinetic of the effect on viability as measured by relative luminescence in *B. subtilis* (pCGLS11) treated with different concentrations of  $\text{C}_8\text{-cTurg-1}$ ,  $\text{C}_{10}\text{-cTurg-1}$ ,  $\text{C}_{10}\text{-cTurg-2}$ ,  $\text{C}_{12}\text{-cTurg-2}$ ,  $\text{C}_8\text{-cTurg-6}$ ,  $\text{C}_{10}\text{-cTurg-6}$ , and  $\text{C}_{12}\text{-cTurg-6}$ .

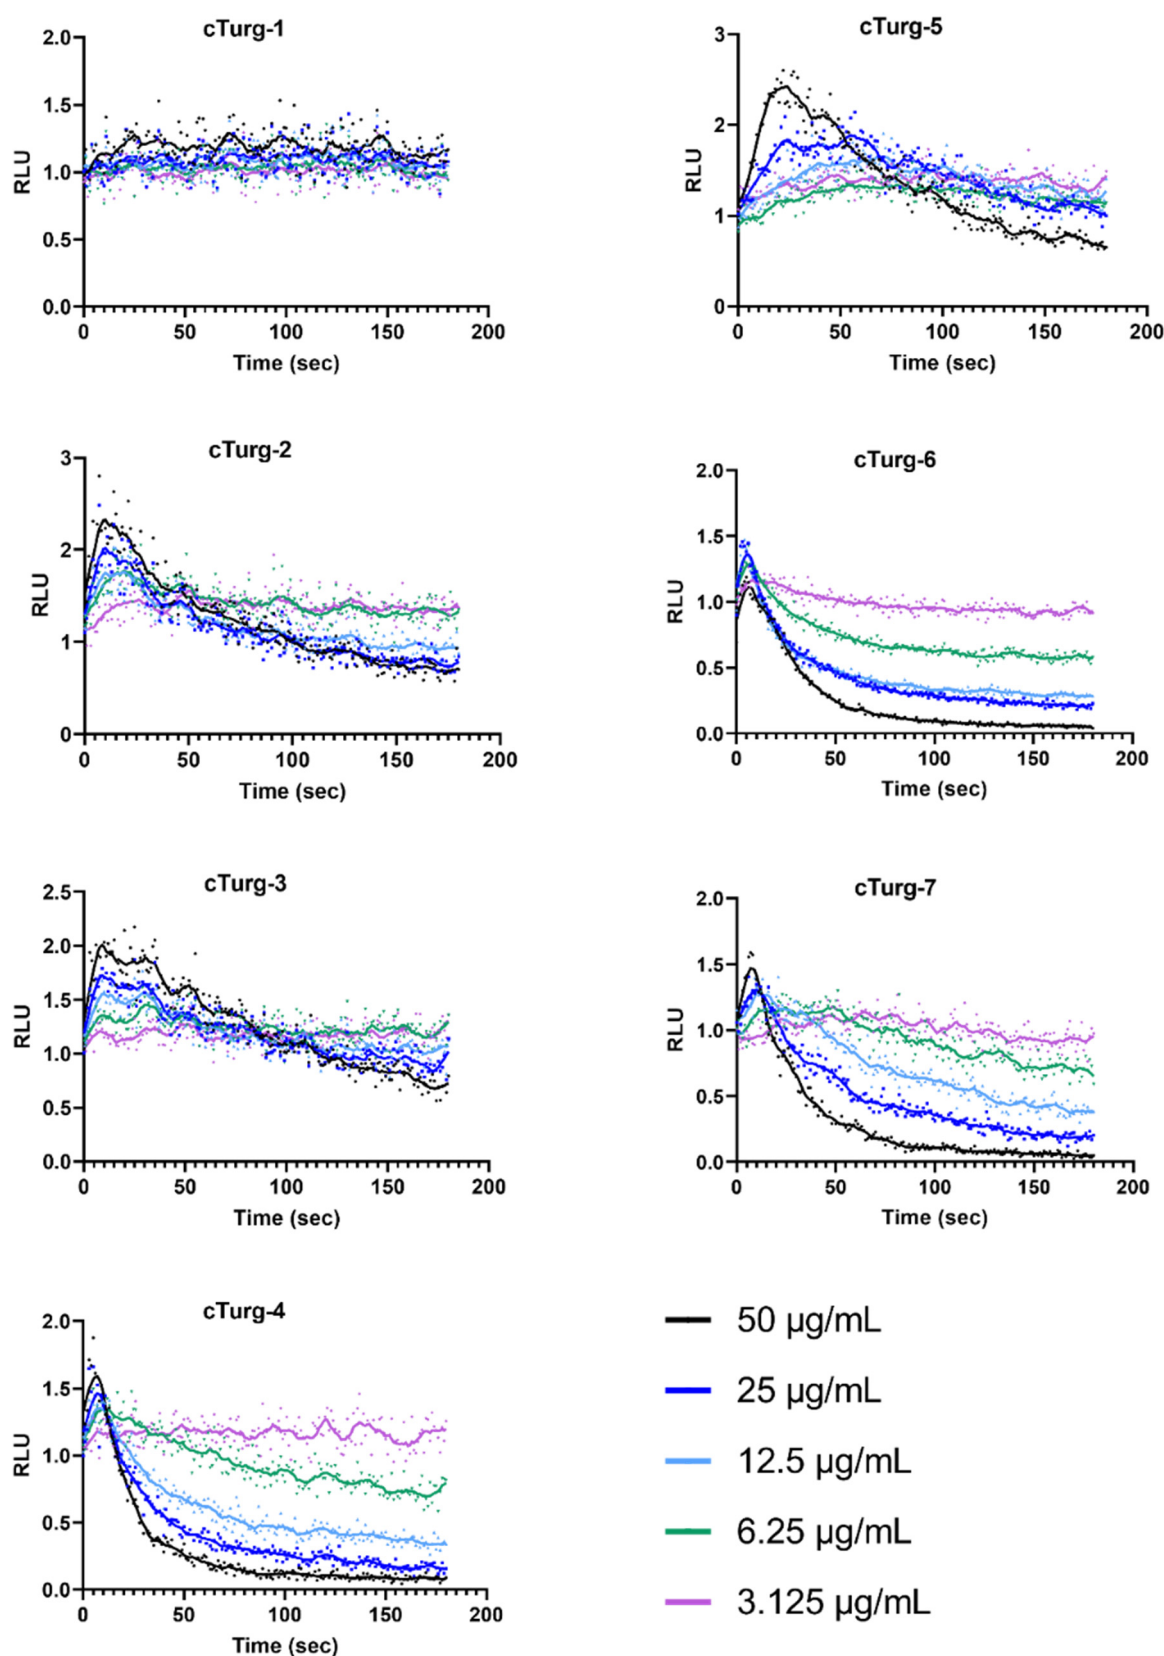

**Figure S28.** Kinetic of the effect on membrane integrity as measured by relative luminescence in *B. subtilis* (pCSS962) treated with different concentrations of cTurg-1, cTurg-2, cTurg-3, cTurg-4, cTurg-5, cTurg-6 and cTurg-7.

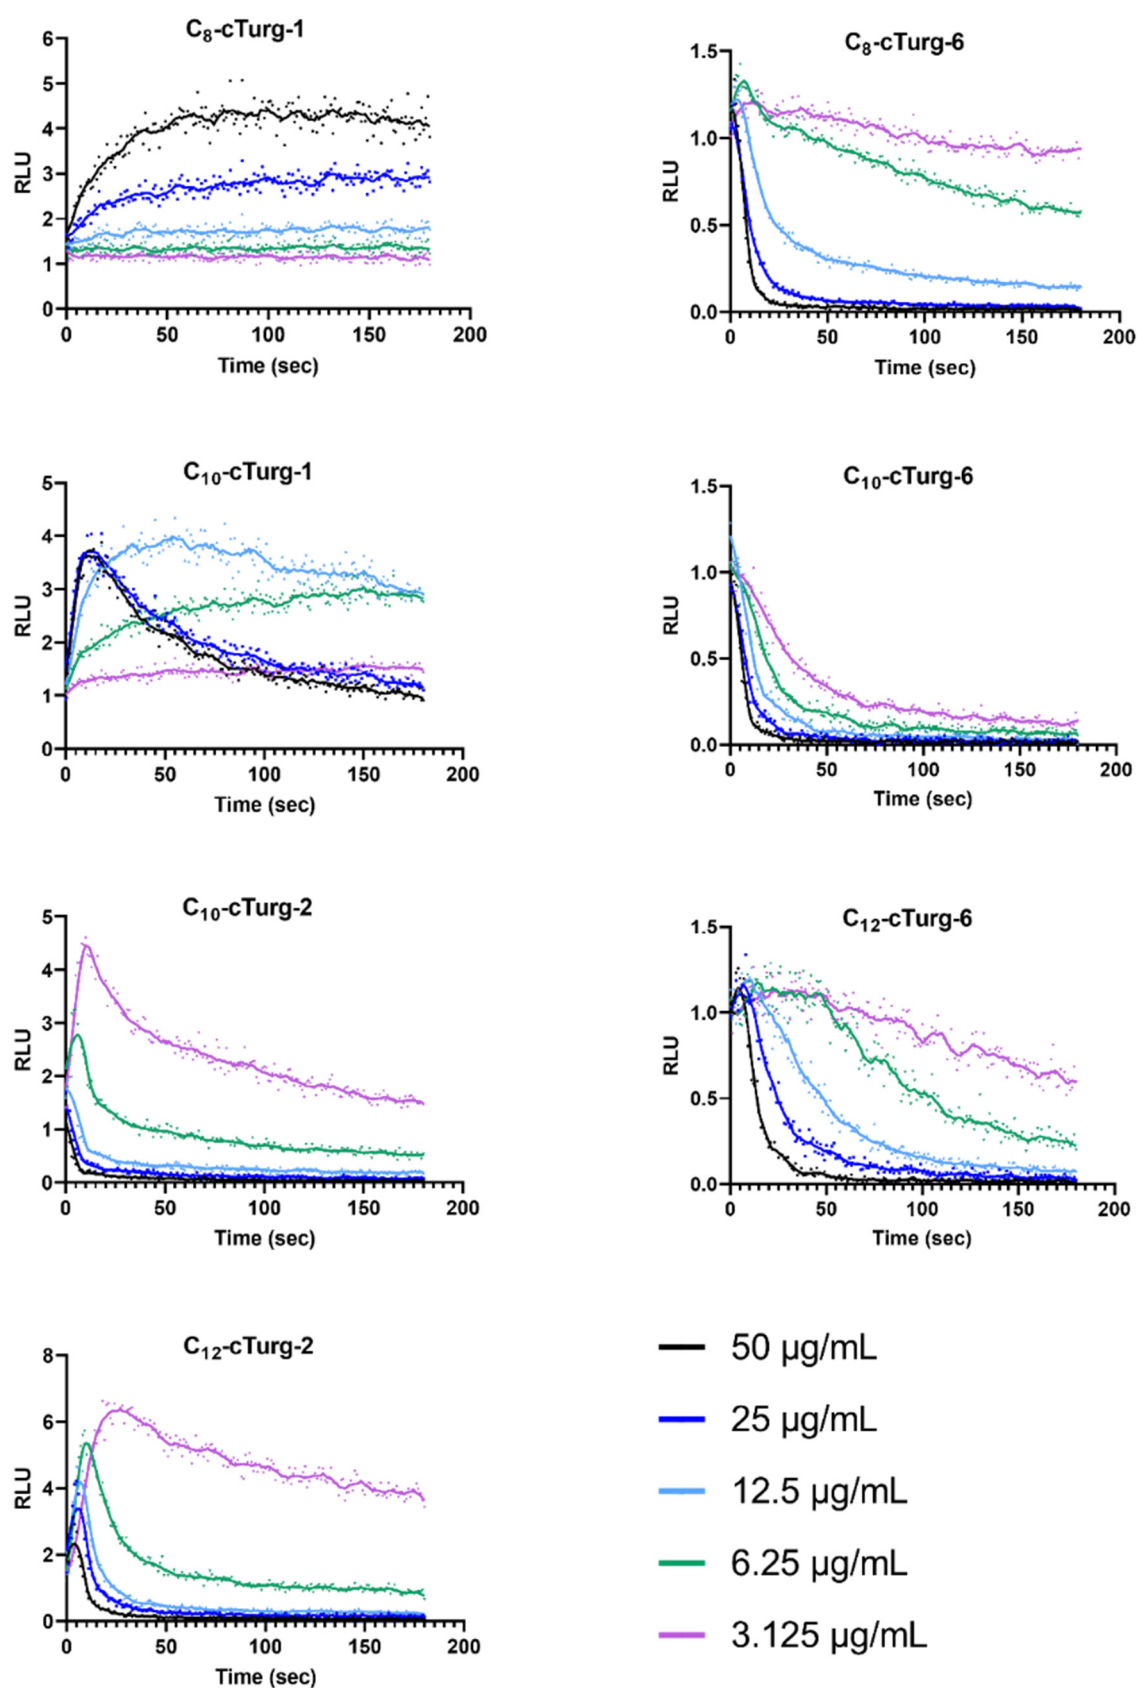

**Figure S29.** Kinetic of the effect on membrane integrity as measured by relative luminescence in *B. subtilis* (pCSS962) treated with different concentrations of C<sub>8</sub>-cTurg-1, C<sub>10</sub>-cTurg-1, C<sub>10</sub>-cTurg-2, C<sub>12</sub>-cTurg-2, C<sub>8</sub>-cTurg-6, C<sub>10</sub>-cTurg-6, and C<sub>12</sub>-cTurg-6.

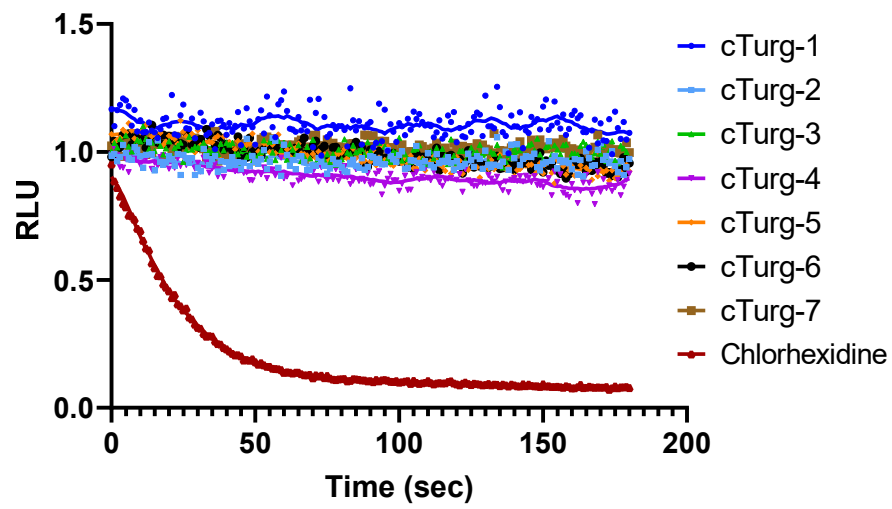

**Figure S30.** Kinetic of the effect on viability as measured by relative luminescence in *E. coli* (pCGLS-11) treated with 50  $\mu\text{g/mL}$  of cTurg-1-7 or 25  $\mu\text{g/mL}$  of chlorhexidine.

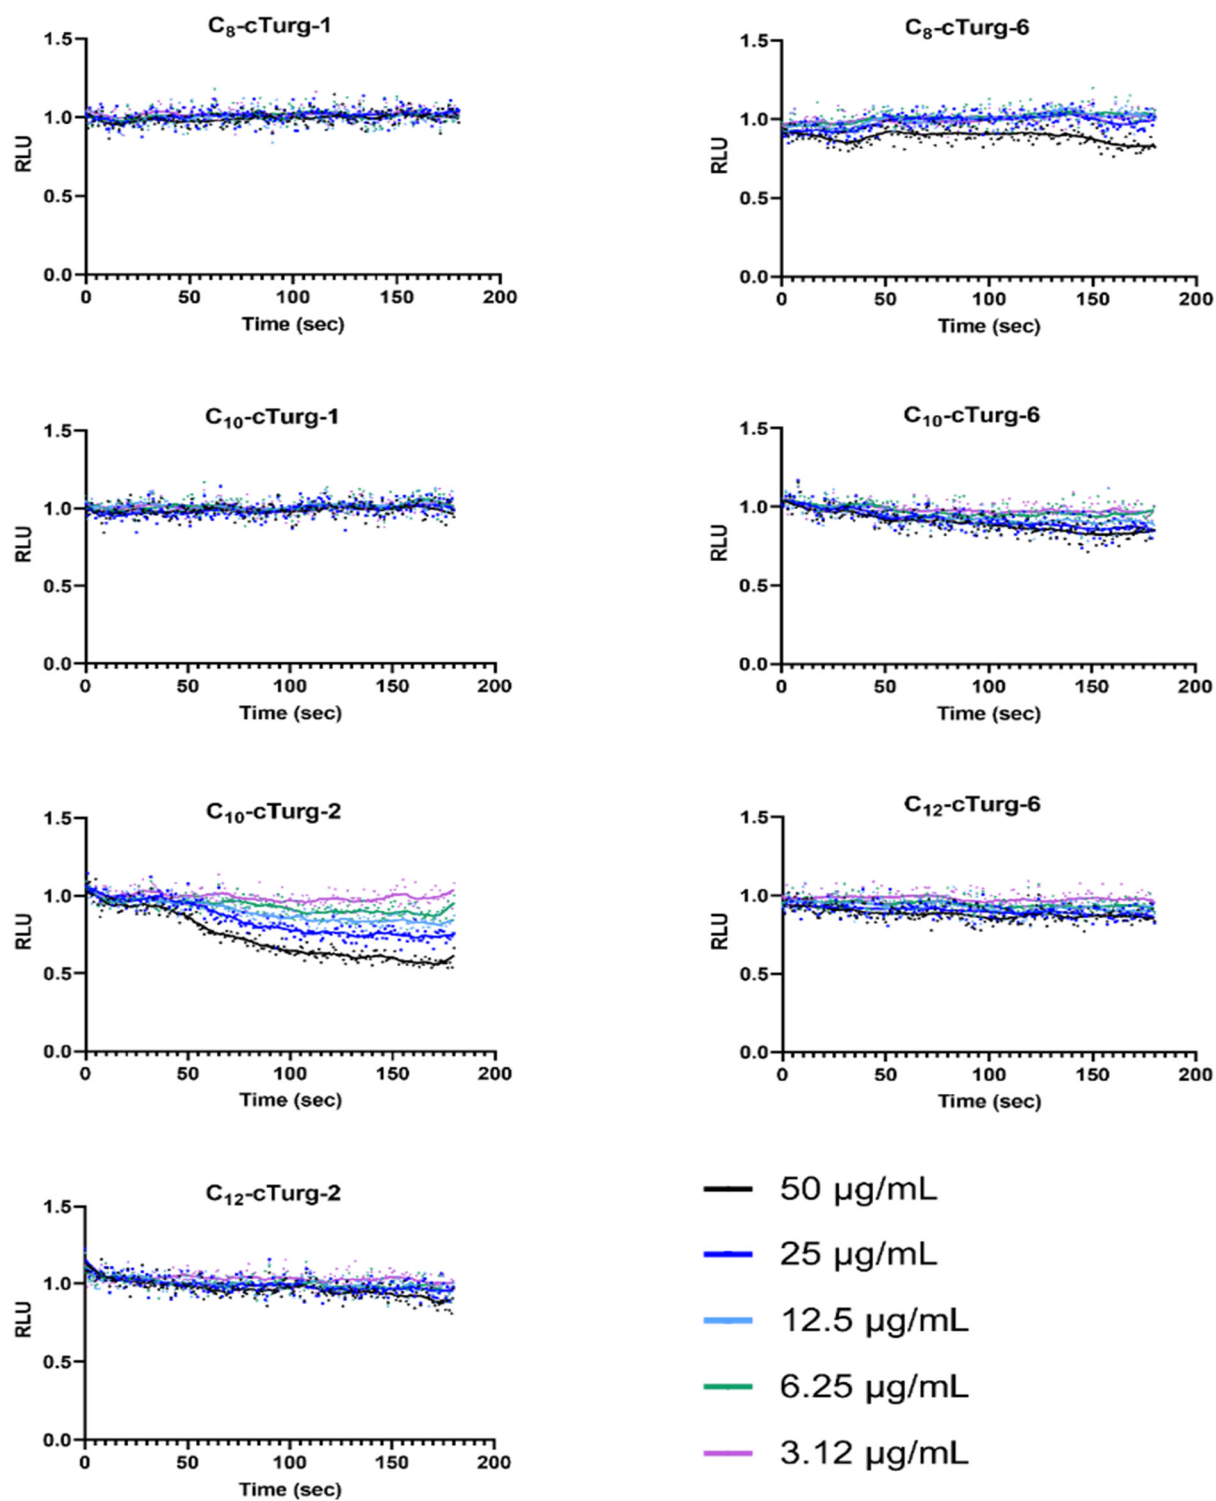

**Figure S31.** Kinetic of the effect on viability as measured by relative luminescence in *E. coli* (pCGLS-11) treated with different concentrations of  $\text{C}_8\text{-cTurg-1}$ ,  $\text{C}_{10}\text{-cTurg-1}$ ,  $\text{C}_{10}\text{-cTurg-2}$ ,  $\text{C}_{12}\text{-cTurg-2}$ ,  $\text{C}_8\text{-cTurg-6}$ ,  $\text{C}_{10}\text{-cTurg-6}$ , and  $\text{C}_{12}\text{-cTurg-6}$ .



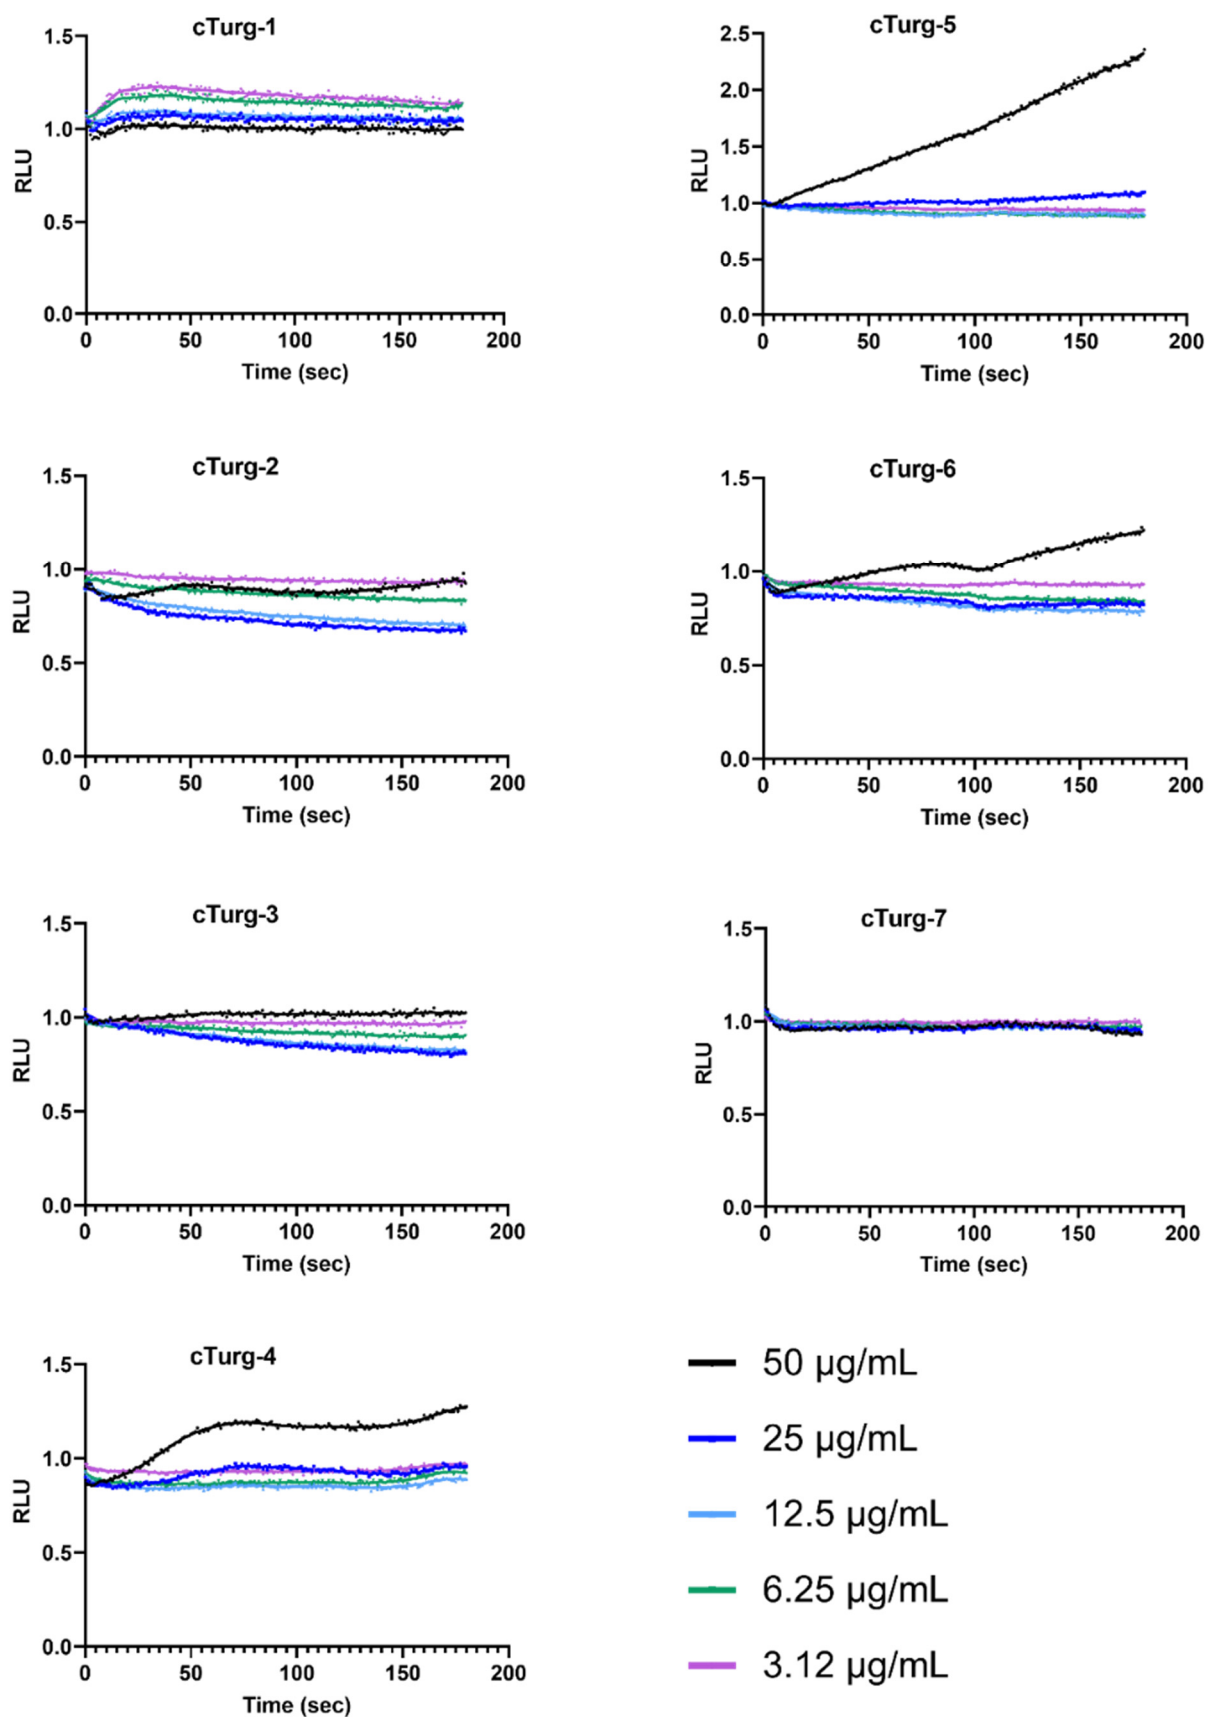

**Figure S32.** Kinetic of the effect on membrane integrity as measured by relative luminescence in *E. coli* (pCSS962) treated with different concentrations of cyclic peptides **cTurg-1**, **cTurg-2**, **cTurg-3**, **cTurg-4**, **cTurg-5**, **cTurg-6** and **cTurg-7**.



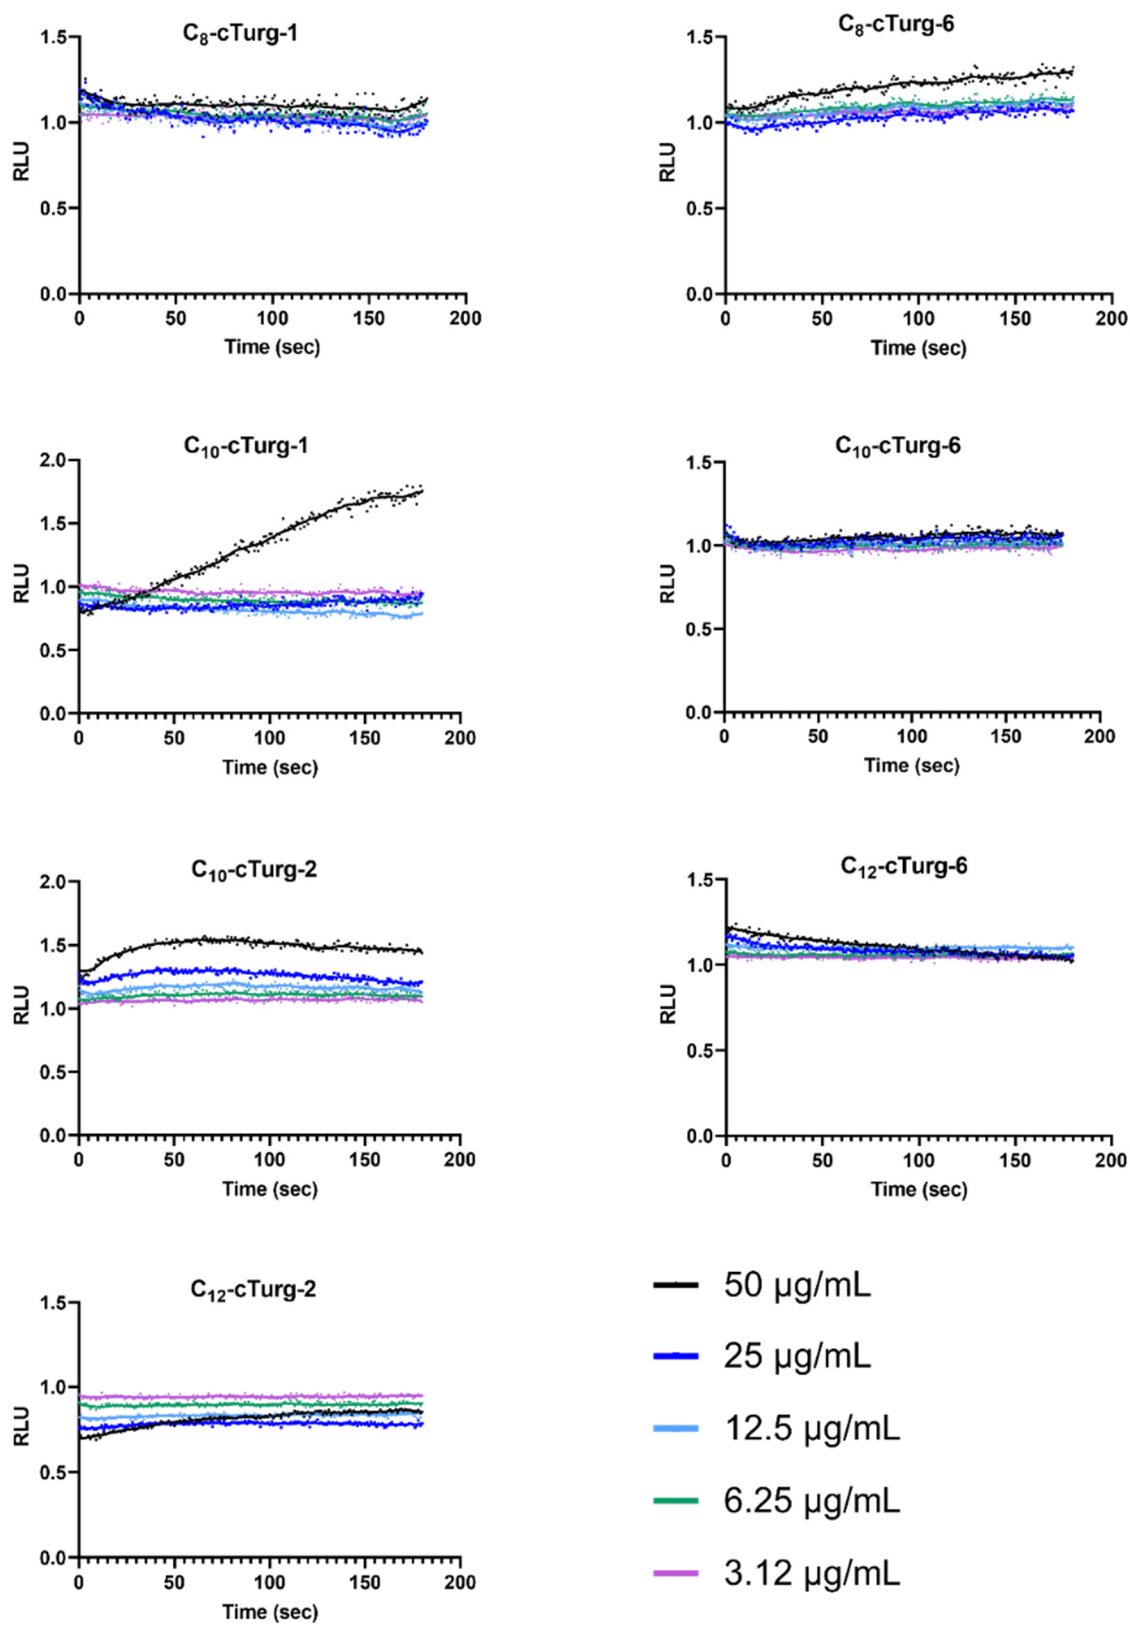

**Figure S33.** Kinetic of the effect on membrane integrity as measured by relative luminescence in *E. coli* (pCSS962) treated with different concentrations of C<sub>8</sub>-cTurg-1, C<sub>10</sub>-cTurg-1, C<sub>10</sub>-cTurg-2, C<sub>12</sub>-cTurg-2, C<sub>8</sub>-cTurg-6, C<sub>10</sub>-cTurg-6, and C<sub>12</sub>-cTurg-6.

**Table S1.** Theoretical and measured monoisotopic mass (Da), and theoretical and observed m/z ions during HRMS of the synthesised peptides.

| Peptide                       | Monoisotopic mass (Da) |           | [M+2H] <sup>2+</sup> |          | [M+3H] <sup>3+</sup> |          | [M+4H] <sup>4+</sup> |          |
|-------------------------------|------------------------|-----------|----------------------|----------|----------------------|----------|----------------------|----------|
|                               | Theoretical            | Measured  | Theoretical          | Measured | Theoretical          | Measured | Theoretical          | Measured |
| <b>cTurg-1</b>                | 1300.6897              | 1300.6915 | 651.3521             | 651.3525 | 434.5705             | 434.5713 | 326.1797             | 326.1803 |
| <b>cTurg-2</b>                | 1518.7741              | 1518.7746 | 760.3943             | 760.3944 | 507.2653             | 507.2656 | 380.7008             | 380.7009 |
| <b>cTurg-3</b>                | 1518.7741              | 1518.7746 | 760.3943             | 760.3944 | 507.2653             | 507.2656 | 380.7008             | 380.7009 |
| <b>cTurg-4</b>                | 1558.8054              | 1558.8061 | 780.4100             | 780.4102 | 520.6091             | 520.6094 | 390.7086             | 390.7088 |
| <b>cTurg-5</b>                | 1630.7986              | 1630.7993 | 816.4066             | 816.4068 | 544.6068             | 544.6071 | 408.7069             | 408.7071 |
| <b>cTurg-6</b>                | 1630.7987              | 1630.7999 | 816.4066             | 816.4068 | 544.6068             | 544.6073 | 408.7069             | 408.7074 |
| <b>cTurg-7</b>                | 1670.8299              | 1670.8308 | 836.4222             | 836.4222 | 557.9506             | 557.9509 | 418.7148             | 418.7152 |
| <b>C<sub>8</sub>-Turg-1</b>   | 1428.8098              | 1428.8104 | 715.4122             | 715.4123 | 477.2772             | 477.2775 | 358.2097             | 358.2099 |
| <b>C<sub>10</sub>-Turg-1</b>  | 1456.8411              | 1456.8415 | 729.4278             | 729.4279 | 486.6210             | 486.6211 | 365.2176             | 365.2177 |
| <b>C<sub>12</sub>-Turg-1</b>  | 1484.8724              | 1484.8732 | 743.4435             | 743.4437 | 495.9647             | 495.9651 | 372.2254             | 372.2256 |
| <b>C<sub>8</sub>-Turg-2</b>   | 1646.8942              | 1646.8950 | 824.4544             | 824.4544 | 549.9720             | 549.9724 | 412.7308             | 412.7311 |
| <b>C<sub>10</sub>-Turg-2</b>  | 1674.9255              | 1674.9254 | 838.4700             | 838.4695 | 559.3158             | 559.3158 | 419.7387             | 419.7388 |
| <b>C<sub>12</sub>-Turg-2</b>  | 1702.9568              | 1702.9566 | 852.4857             | 852.4851 | 568.6595             | 568.6597 | 426.7465             | 426.7465 |
| <b>C<sub>8</sub>-Turg-6</b>   | 1758.9188              | 1758.9195 | 880.4667             | 880.4666 | 587.3135             | 587.3139 | 440.7370             | 440.7373 |
| <b>C<sub>10</sub>-Turg-6</b>  | 1786.9501              | 1786.9515 | 894.4823             | 894.4827 | 596.6573             | 596.6579 | 447.7448             | 447.7452 |
| <b>C<sub>12</sub>-Turg-6</b>  | 1814.9814              | 1814.9829 | 908.4980             | 908.4981 | 606.0011             | 606.0019 | 454.7526             | 454.7531 |
| <b>C<sub>8</sub>-cTurg-1</b>  | 1426.7941              | 1426.7948 | 714.4043             | 714.4045 | 476.6053             | 476.6056 | 357.7058             | 357.7060 |
| <b>C<sub>10</sub>-cTurg-1</b> | 1454.8254              | 1454.8257 | 728.4200             | 728.4200 | 485.9491             | 485.9493 | 364.7136             | 364.7137 |
| <b>C<sub>12</sub>-cTurg-1</b> | 1482.8567              | 1482.8573 | 742.4356             | 742.4358 | 495.2928             | 495.2931 | 371.7215             | 371.7216 |
| <b>C<sub>8</sub>-cTurg-2</b>  | 1644.8785              | 1644.8805 | 823.4465             | 823.4470 | 549.3001             | 549.3013 | 412.2269             | 412.2273 |
| <b>C<sub>10</sub>-cTurg-2</b> | 1672.9098              | 1672.9107 | 837.4622             | 837.4621 | 558.6439             | 558.6446 | 419.2347             | 419.2349 |
| <b>C<sub>12</sub>-cTurg-2</b> | 1700.9411              | 1700.9422 | 851.4778             | 851.4775 | 567.9876             | 567.9888 | 426.2426             | 426.2427 |
| <b>C<sub>8</sub>-cTurg-6</b>  | 1756.9031              | 1756.9036 | 879.4588             | 879.4586 | 586.6416             | 586.6420 | 440.2331             | 440.2333 |
| <b>C<sub>10</sub>-cTurg-6</b> | 1784.9344              | 1784.9351 | 893.4745             | 893.4743 | 595.9854             | 595.9860 | 447.2409             | 447.2411 |
| <b>C<sub>12</sub>-cTurg-6</b> | 1812.9657              | 1812.9685 | 907.4901             | 907.4905 | 605.3292             | 605.3303 | 454.2487             | 454.2498 |

**Table S2.** Purity of synthesized peptides (%) and retention time (min), determined by UPLC using a reversed phase column.

| Peptide                       | Sequence | Purity [%] | Retention time [min] |
|-------------------------------|----------|------------|----------------------|
| <b>cTurg-1</b>                | cyclic   | 100.00     | 3.11                 |
| <b>cTurg-2</b>                | cyclic   | 96.53      | 3.87                 |
| <b>cTurg-3</b>                | cyclic   | 96.43      | 3.92                 |
| <b>cTurg-4</b>                | cyclic   | 95.79      | 3.97                 |
| <b>cTurg-5</b>                | cyclic   | 95.74      | 3.98                 |
| <b>cTurg-6</b>                | cyclic   | 90.59      | 4.02                 |
| <b>cTurg-7</b>                | cyclic   | 95.61      | 4.09                 |
| <b>C<sub>8</sub>-Turg-1</b>   | linear   | 99.16      | 4.38                 |
| <b>C<sub>10</sub>-Turg-1</b>  | linear   | 95.87      | 4.89                 |
| <b>C<sub>12</sub>-Turg-1</b>  | linear   | 96.01      | 5.44                 |
| <b>C<sub>8</sub>-Turg-2</b>   | linear   | 98.04      | 4.97                 |
| <b>C<sub>10</sub>-Turg-2</b>  | linear   | 96.40      | 5.41                 |
| <b>C<sub>12</sub>-Turg-2</b>  | linear   | 96.38      | 5.89                 |
| <b>C<sub>8</sub>-Turg-6</b>   | linear   | 95.04      | 5.07                 |
| <b>C<sub>10</sub>-Turg-6</b>  | linear   | 95.53      | 5.51                 |
| <b>C<sub>12</sub>-Turg-6</b>  | linear   | 95.16      | 5.98                 |
| <b>C<sub>8</sub>-cTurg-1</b>  | cyclic   | 92.83      | 4.27                 |
| <b>C<sub>10</sub>-cTurg-1</b> | cyclic   | 91.51      | 4.74                 |
| <b>C<sub>12</sub>-cTurg-1</b> | cyclic   | 93.36      | 5.22                 |
| <b>C<sub>8</sub>-cTurg-2</b>  | cyclic   | 96.32      | 4.70                 |
| <b>C<sub>10</sub>-cTurg-2</b> | cyclic   | 91.79      | 5.11                 |
| <b>C<sub>12</sub>-cTurg-2</b> | cyclic   | 95.32      | 5.55                 |
| <b>C<sub>8</sub>-cTurg-6</b>  | cyclic   | 94.15      | 4.85                 |
| <b>C<sub>10</sub>-cTurg-6</b> | cyclic   | 93.65      | 5.28                 |
| <b>C<sub>12</sub>-cTurg-6</b> | cyclic   | 92.52      | 5.72                 |

**Table S3.** Selectivity index (SI) calculated as the ration between haemolytic activity (EC<sub>50</sub>, in µg/mL) and the geometric mean (GM) of the MIC values (in µg/mL) against bacteria and fungi, i.e., SI = EC<sub>50</sub> / GM. MIC >256 were set to 256 for bacteria, MIC >128 were set to 128 for fungi, and the values for the highest tested concentration was used for haemolytic activity when calculating the SI.

|                     |       | GM of MIC                |     |     |                         | Selectivity index (SI) |                 |    |            |
|---------------------|-------|--------------------------|-----|-----|-------------------------|------------------------|-----------------|----|------------|
|                     |       | Peptide                  | G+  | G-  | Tot. bact. <sup>1</sup> | Fungi                  | G+              | G- | Tot. Fungi |
| Cyclic peptides     | W     | cTurg-1                  | 128 | 256 | 161                     | 64                     | nd <sup>2</sup> | nd | nd         |
|                     |       | cTurg-2                  | 11  | 64  | 20                      | 32                     | 92              | 16 | 52         |
|                     |       | cTurg-3                  | 10  | 64  | 18                      | 32                     | 89              | 13 | 47         |
|                     |       | cTurg-4                  | 16  | 128 | 32                      | 40                     | 67              | 8  | 33         |
|                     | R / W | cTurg-5                  | 8   | 11  | 9                       | 32                     | 138             | 97 | 123        |
|                     |       | cTurg-6                  | 7   | 11  | 8                       | 32                     | 164             | 97 | 138        |
|                     |       | cTurg-7                  | 7   | 23  | 10                      | 32                     | 29              | 9  | 20         |
| Linear lipopeptides | W     | C <sub>8</sub> -Turg-1   | 19  | 64  | 29                      | 40                     | 50              | 15 | 33         |
|                     |       | C <sub>10</sub> -Turg-1  | 7   | 23  | 10                      | 25                     | 142             | 42 | 95         |
|                     |       | C <sub>12</sub> -Turg-1  | 5   | 11  | 6                       | 25                     | 204             | 86 | 153        |
|                     | R / W | C <sub>8</sub> -Turg-2   | 7   | 16  | 9                       | 40                     | 29              | 12 | 22         |
|                     |       | C <sub>10</sub> -Turg-2  | 7   | 11  | 8                       | 40                     | 10              | 6  | 8          |
|                     |       | C <sub>12</sub> -Turg-2  | 11  | 23  | 14                      | 40                     | 5               | 2  | 4          |
|                     |       | C <sub>8</sub> -Turg-6   | 7   | 16  | 9                       | 102                    | 8               | 3  | 6          |
|                     |       | C <sub>10</sub> -Turg-6  | 16  | 45  | 23                      | 102                    | 1               | 0  | 1          |
|                     |       | C <sub>12</sub> -Turg-6  | 19  | 91  | 32                      | 91                     | 2               | 0  | 1          |
| Cyclic lipopeptides | W     | C <sub>8</sub> -cTurg-1  | 16  | 64  | 25                      | 32                     | 59              | 15 | 37         |
|                     |       | C <sub>10</sub> -cTurg-1 | 4   | 16  | 6                       | 20                     | 239             | 60 | 151        |
|                     |       | C <sub>12</sub> -cTurg-1 | 3   | 8   | 4                       | 20                     | 77              | 27 | 55         |
|                     | W     | C <sub>8</sub> -cTurg-2  | 3   | 6   | 4                       | 13                     | 155             | 78 | 123        |
|                     |       | C <sub>10</sub> -cTurg-2 | 3   | 8   | 5                       | 32                     | 32              | 13 | 24         |
|                     |       | C <sub>12</sub> -cTurg-2 | 7   | 16  | 9                       | 40                     | 5               | 2  | 4          |
|                     | R / W | C <sub>8</sub> -cTurg-6  | 5   | 11  | 6                       | 51                     | 6               | 3  | 5          |
|                     |       | C <sub>10</sub> -cTurg-6 | 6   | 16  | 8                       | 51                     | 3               | 1  | 2          |
|                     |       | C <sub>12</sub> -cTurg-6 | 10  | 32  | 14                      | 81                     | 1               | 0  | 1          |

<sup>1</sup> GM of all bacterial test strains, <sup>2</sup> nd: not determined.
